# Supplementary material for: An efficient colorimetric and fluorescent probe for the detection of fluoride ions based on a benzothiadiazole derivative
Source: Royal Society of Chemistry journal article supplement (doi:10.1039/c5ay02108a), 2015-01-01
Supplement: c5ay02108a1.pdf [file c5ay02108a1.pdf]

## Supporting Information

### **An efficient colorimetric and fluorescent probe for detection fluoride based on benzothiadiazole derivative**

Yanhua Yu<sup>a\*</sup> and Chang-zhi Dong<sup>a,b</sup>

a. Institute for Interdisciplinary Research, Jiangnan University, Wuhan 430056, China; E-Mail:  
hpyyh@aliyun.com.Tel: +86(027)84223798

b. University Paris Diderot, Sorbonne Paris Cité, ITODYS, UMR CNRS 7086, 15 rue J-A de Baïf,  
75205 Paris Cedex 13, France;

### Contents

|                                                                                          |          |
|------------------------------------------------------------------------------------------|----------|
| <b>1 <sup>1</sup>H NMR and <sup>13</sup>C NMR copies of products.....</b>                | <b>1</b> |
| <b>2 Determination of the detection limit.....</b>                                       | <b>5</b> |
| <b>3 Fluorescence intensity of probe 3 versus low concentration of F<sup>-</sup>....</b> | <b>5</b> |

# <sup>1</sup>H NMR and <sup>13</sup>C NMR spectra of compound 1 to 3

## Compound 1

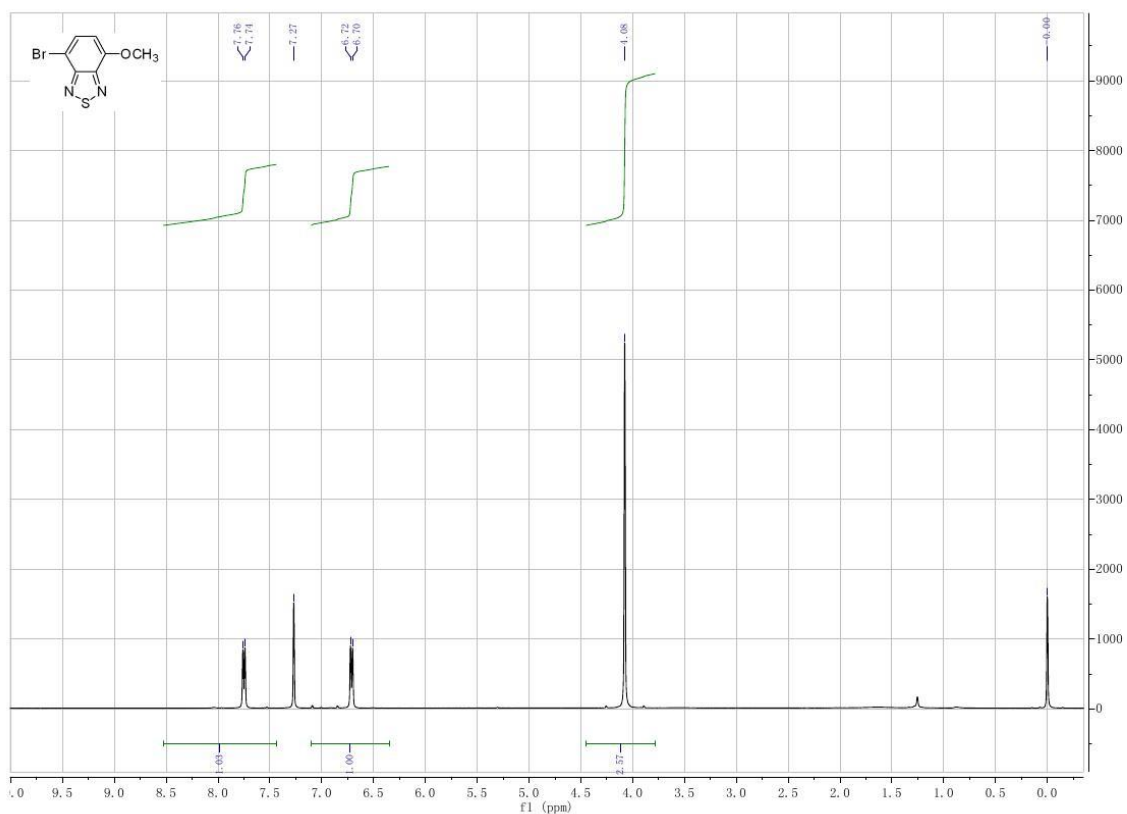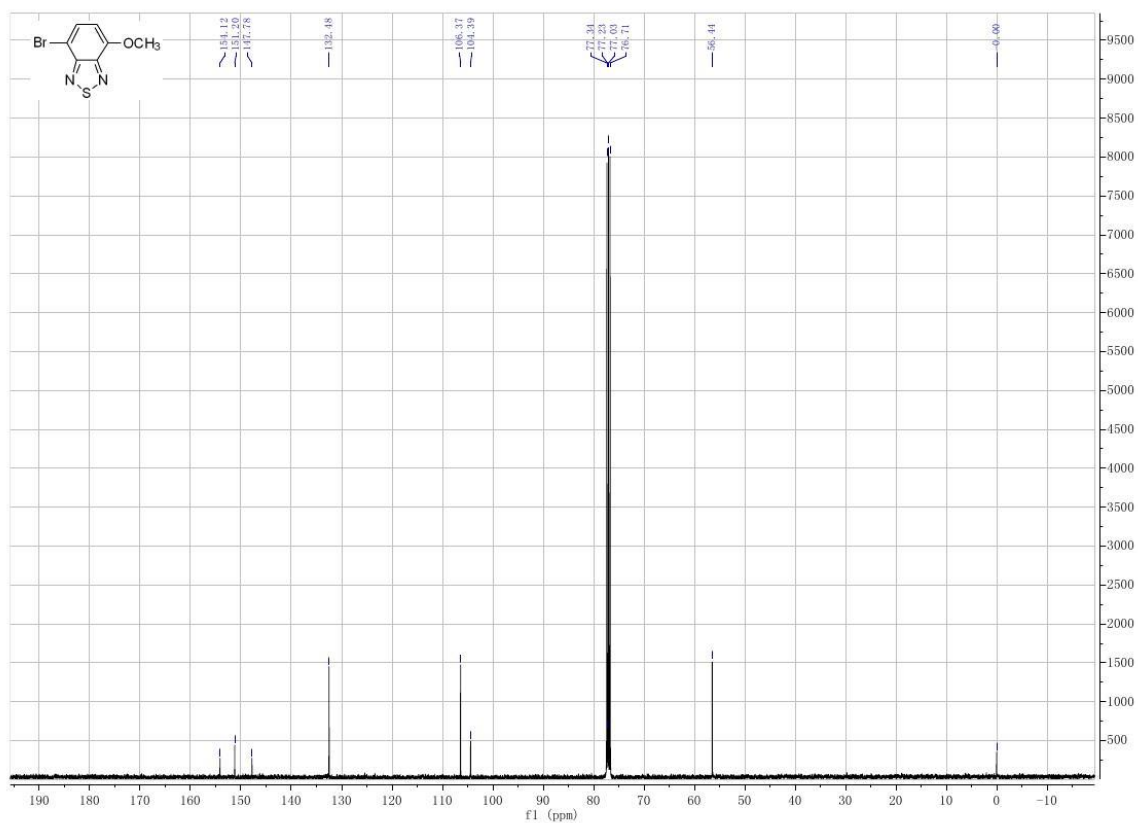

# Compound 2

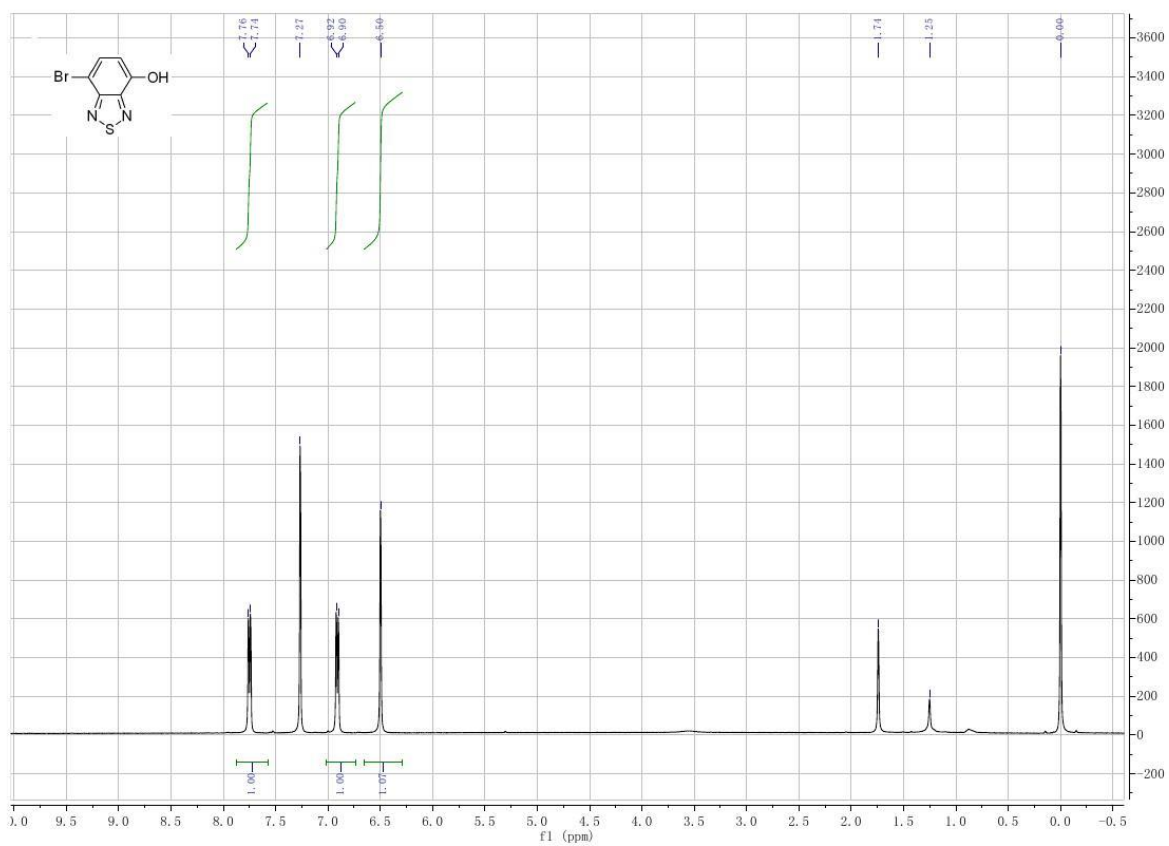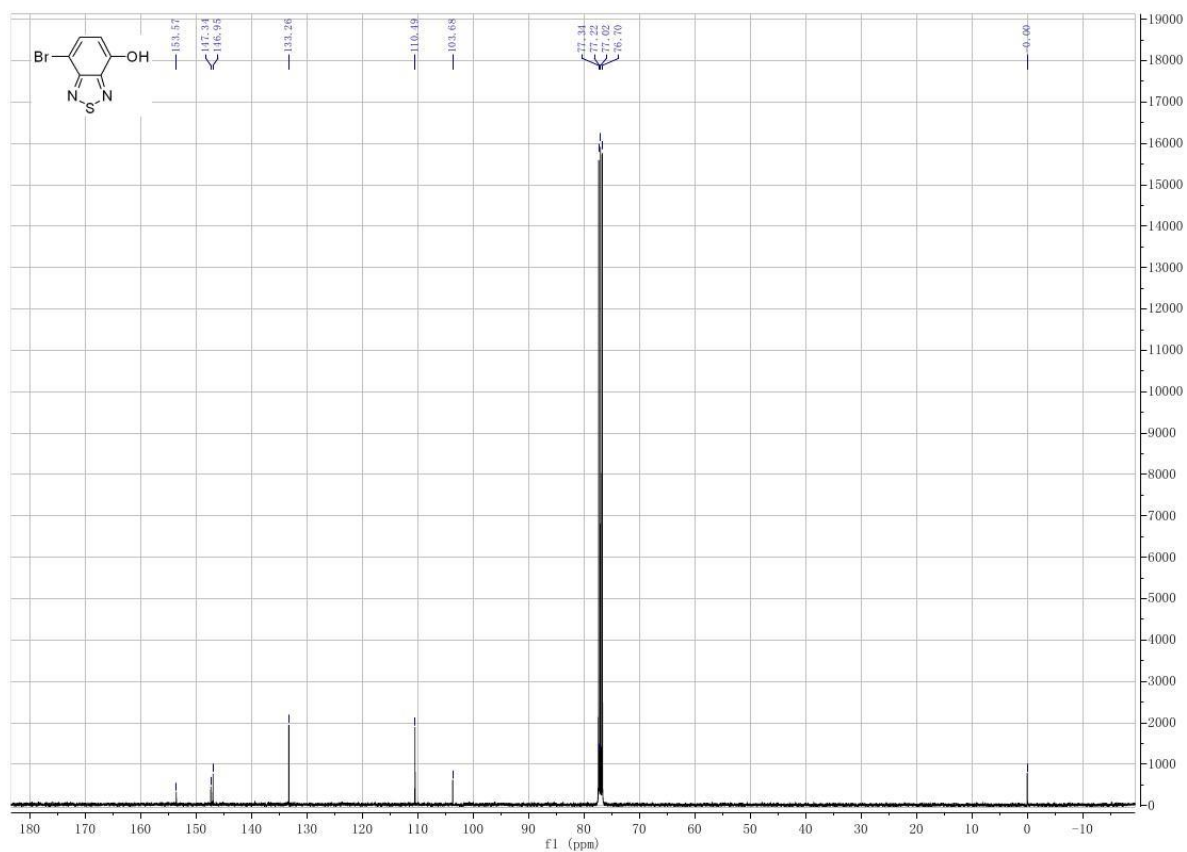

# Compound 3

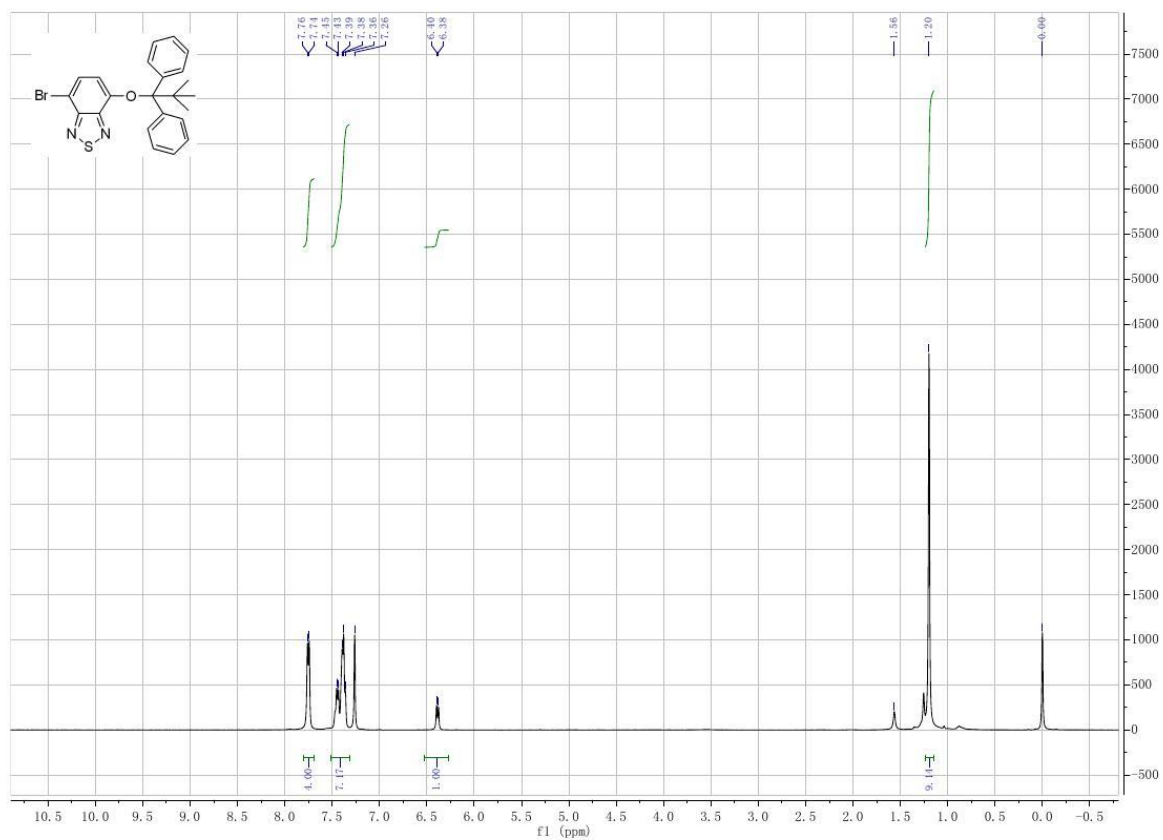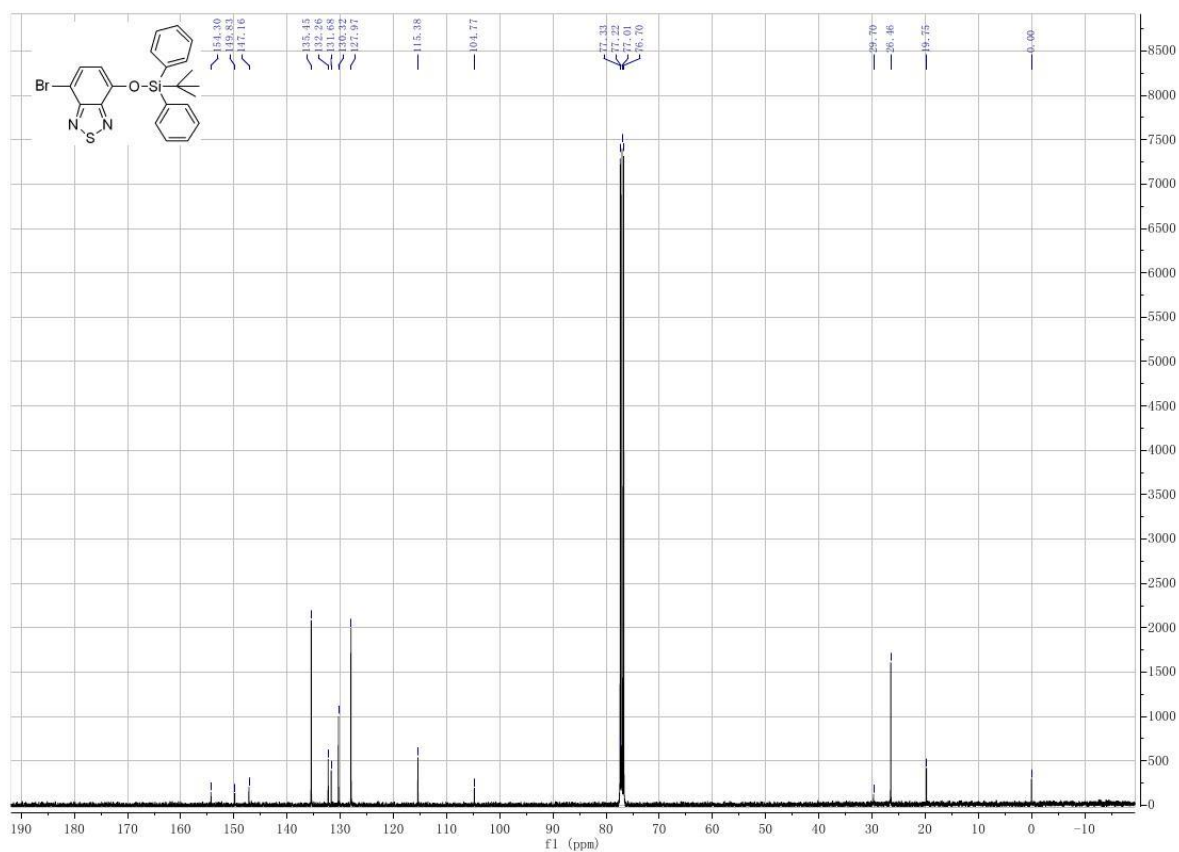

## Determination of the detection limit

$$\text{Detection limit} = 3\sigma/k$$

Where  $\sigma$  is the standard deviation of blank measurement,  $k$  is the slope between the absorbance versus  $F^-$  concentration.

The detection limit was calculated based on the absorption titration. The absorption spectrum of probe 3 was measured by 15 times and the standard deviation of blank measurement was calculated to give  $4.87E-4$ .

To gain the slope, the absorbance at 519 nm was plotted as a concentration of  $F^-$  from 2.5 to 30  $\mu\text{M}$ . The slope is 860.12.

So the detection limit was calculated with equation:

$$\begin{aligned}\text{Detection limit} &= 3\sigma/k \\ &= 3 \times 4.87E-4 / 860.12 \\ &= 1.7 \mu\text{M}\end{aligned}$$

## Fluorescence intensity of probe 3 versus low concentration of $F^-$

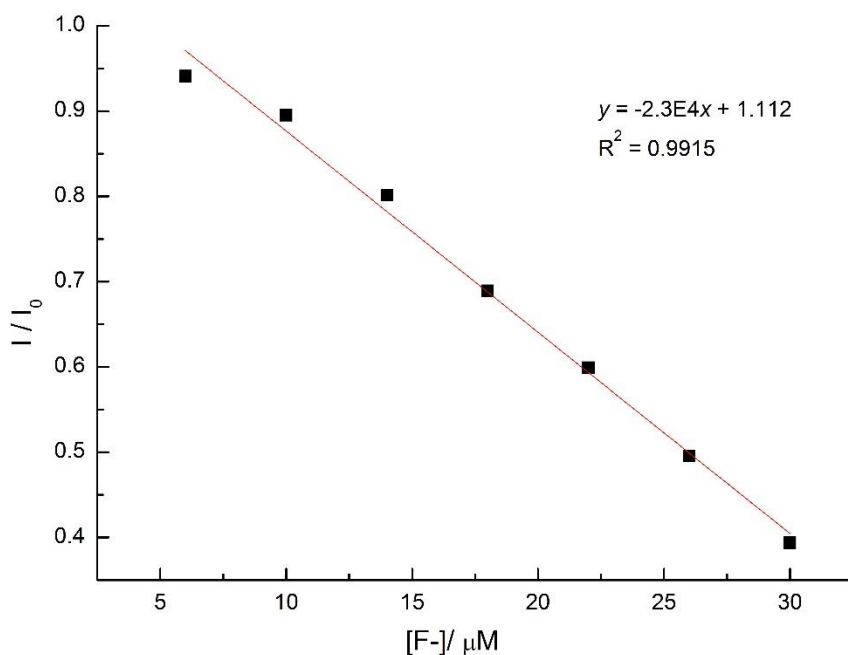

Fig. S1 Relative fluorescence intensity of probe 3 at low concentrations of  $F^-$  from 5 to 30  $\mu\text{M}$  in the mixture of acetonitrile and Tris-HCl buffer ( $v/v = 9:1$ ,  $\text{pH} = 7.5$ )
